# Supplementary material for: VEGF‐B signaling impairs endothelial glucose transcytosis by decreasing membrane cholesterol content
Source: PubMed Central journal article supplement (PMC7332976; doi:10.15252/embr.201949343), 2020-05-24
Supplement: EMBR-21-e49343-s002.pdf [file EMBR-21-e49343-s002.pdf]

## Expanded View Figures

### Figure EV1. VEGF-B regulates fatty acid and glucose uptake in endothelial cells of different origin.

- A Bodipy- $C_{12}$ -FA uptake in murine pancreatic endothelial cells (MS1, panels to the left) and primary human umbilical vein endothelial cells (HUVEC, panels to the right) treated for 2 h with VEGF- $B_{167}$  (B167) or VEGF- $B_{186}$  (B186). Data presented as mean  $\pm$  SEM from representative experiments performed in triplicates. Statistical evaluation using one-way ANOVA and Dunnett's multiple comparison test,  $P$ -value: \* $< 0.05$ , \*\* $< 0.01$  (compared to untreated control). Scale bar, 20  $\mu$ m.
- B 2-NBD-glucose uptake (panels to the left) and Bodipy- $C_{12}$ -FA uptake (panels to the right) in primary human brain microvascular endothelial cells (HBMEC) treated for 2 h with VEGF- $B_{167}$  (B167) or VEGF- $B_{186}$  (B186). Data presented as mean  $\pm$  SEM from representative experiments performed in triplicates. Statistical evaluation using one-way ANOVA and Dunnett's multiple comparison test,  $P$ -value: \* $< 0.05$ , \*\* $< 0.01$  (compared to untreated control). Scale bar, 20  $\mu$ m.
- C 2-NBD-glucose uptake (panels to the left) and Bodipy- $C_{12}$ -FA uptake (panels to the right) in primary human cardiac microvascular endothelial cells (HCMEC) treated for 2 h with VEGF- $B_{167}$  (B167) or VEGF- $B_{186}$  (B186). Data presented as mean  $\pm$  SEM from representative experiments performed in triplicates. Statistical evaluation using one-way ANOVA and Dunnett's multiple comparison test,  $P$ -value: \* $< 0.05$ , \*\* $< 0.01$  (compared to untreated control). Scale bar, 20  $\mu$ m.
- D 2-NBD-glucose uptake in murine pancreatic endothelial cells (MS1) and primary human umbilical vein endothelial cells (HUVEC) treated for 10 min and 2 h with VEGF- $A_{165}$  (A165). Data presented as mean  $\pm$  SEM from a representative experiment performed in triplicates. Statistical evaluation using one-way ANOVA and Dunnett's multiple comparison test revealed no significant differences.
- E The dynamics of 2-NBD-glucose uptake in primary human umbilical vein endothelial cells (HUVEC) is stable over time up to 40 min after adding the 2-NBD-glucose tracer. Data obtained after 10, 20, 30, or 40 min of tracer incubation and presented as mean  $\pm$  SEM from a representative experiment performed in triplicates.
- F mRNA expression analysis of genes involved in glycogen metabolism in cardiac tissue derived from *Vegfb*<sup>+/+</sup> ( $n = 6$ ), *Vegfb*<sup>+/-</sup> ( $n = 6$ ), and *Vegfb*<sup>-/-</sup> ( $n = 6$ ) mice. Data presented as mean  $\pm$  StDev relative to *Rpl19* expression. Statistical evaluation using one-way ANOVA and Fisher's LSD test,  $P$ -value: \* $< 0.05$  (compared to *Vegfb*<sup>+/+</sup>).

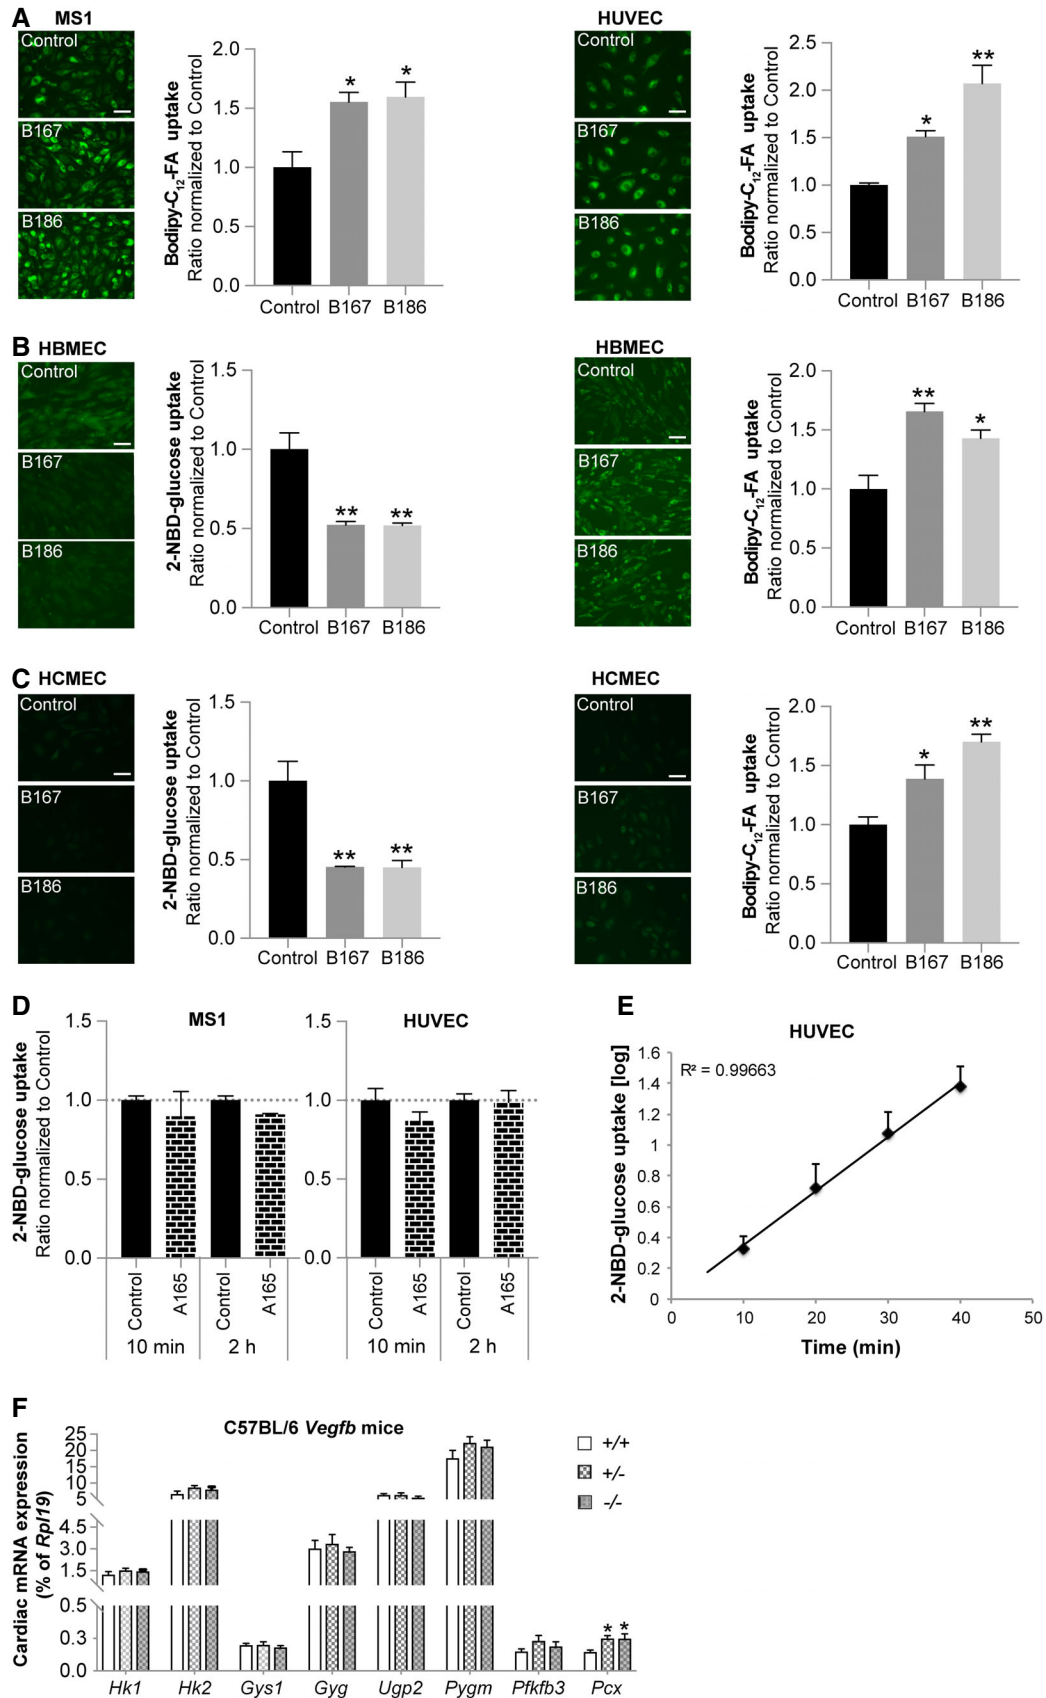

Figure EV1.

**Figure EV2. VEGF-B regulated glucose uptake is mediated by GLUT1, NRP1, and VEGFR1.**

- A 2-NBD-glucose uptake in response to 2 h treatment with VEGF-B<sub>186</sub> (B186) in murine pancreatic endothelial cells (MS1) exhibiting stable shRNA-mediated knockdown of *Flt1* (VEGFR1), *Nrp1*, or control shRNA (left panel). Data presented as mean ± SEM from a representative experiment performed in triplicates. Statistical evaluation using one-way ANOVA and Sidak's multiple comparison test, *P*-value: \* < 0.05 (compared to respective control). ShRNA-mediated knockdown of *Flt1* (VEGFR1) and *Nrp1* expression (right panel).
- B 2-NBD-glucose uptake in response to 2-h treatment with VEGF-B<sub>186</sub> (B186) in the absence or presence of isopropyl β-D-1-thiogalactopyranoside (IPTG) in murine pancreatic endothelial cells (MS1) exhibiting inducible shRNA-mediated knockdown of *Slc2a1* (Glut1) (left panel). Data presented as mean ± SEM from a representative experiment performed in triplicates. Statistical evaluation using one-way ANOVA and Sidak's multiple comparison test, *P*-value: \* < 0.05 (compared to respective control). ShRNA-mediated knockdown of GLUT1 protein expression (right panel).
- C 2-NBD-glucose uptake in response to 2 h treatment with VEGF-B<sub>186</sub> (B186) in the absence or presence of 500 nM phorbol 12-myristate 13-acetate (PMA) in primary human umbilical vein endothelial cells (HUVEC). Data presented as mean ± SEM from a representative experiment performed in triplicates. Statistical evaluation using one-way ANOVA and Tukey's multiple comparison test, *P*-value: \*\*\* < 0.001 (compared to DMSO control). *P*-value: ### < 0.001 (PMA VEGF-B<sub>186</sub> compared to PMA control).
- D Bodipy-C<sub>12</sub>-FA uptake in response to 2-h treatment with VEGF-B<sub>186</sub> (B186) in the absence or presence of isopropyl β-D-1-thiogalactopyranoside (IPTG) in murine pancreatic endothelial cells (MS1) exhibiting inducible shRNA-mediated knockdown of *Slc2a1* (Glut1). Data presented as mean ± SEM from a representative experiment performed in triplicates. Statistical evaluation using one-way ANOVA and Sidak's multiple comparison test, *P*-value: \*\*\* < 0.001 (compared to respective control).
- E Bodipy-C<sub>12</sub>-FA uptake in response to 2-h treatment with VEGF-B<sub>186</sub> (B186) in primary human umbilical vein endothelial cells (HUVEC) exhibiting siRNA-mediated knockdown of *SLC2A1* (GLUT1). Data presented as mean ± SEM from a representative experiment performed in triplicates. Statistical evaluation using one-way ANOVA and Sidak's multiple comparison test, *P*-value: \* < 0.05, \*\* < 0.01 (compared to respective control).
- F Bodipy-C<sub>12</sub>-FA uptake in response to 2-h treatment with VEGF-B<sub>186</sub> (B186) in murine pancreatic endothelial cells (MS1) exhibiting stable shRNA-mediated knockdown of *Flt1* (VEGFR1), *Nrp1* or control shRNA (left panel). Data presented as mean ± SEM from a representative experiment performed in triplicates. Statistical evaluation using one-way ANOVA and Sidak's multiple comparison test, *P*-value: \*\*\* < 0.001 (compared to respective control).

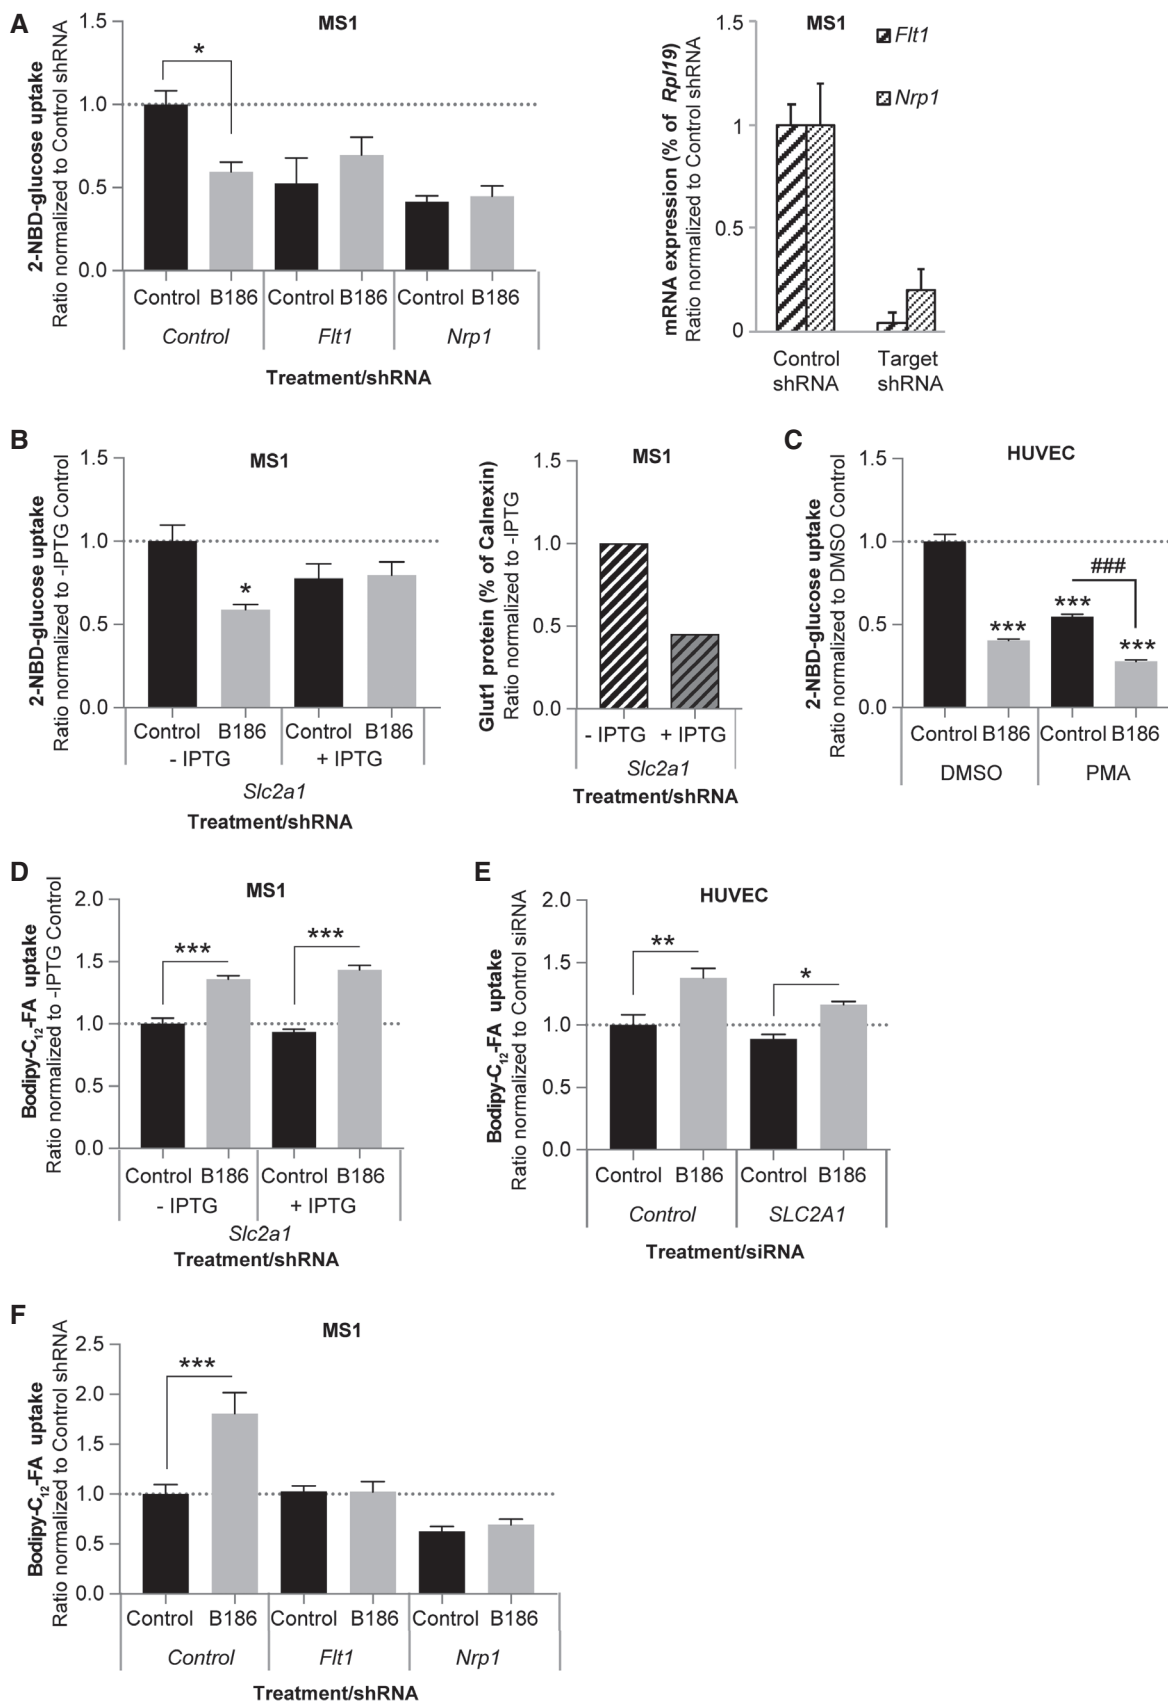

Figure EV2.

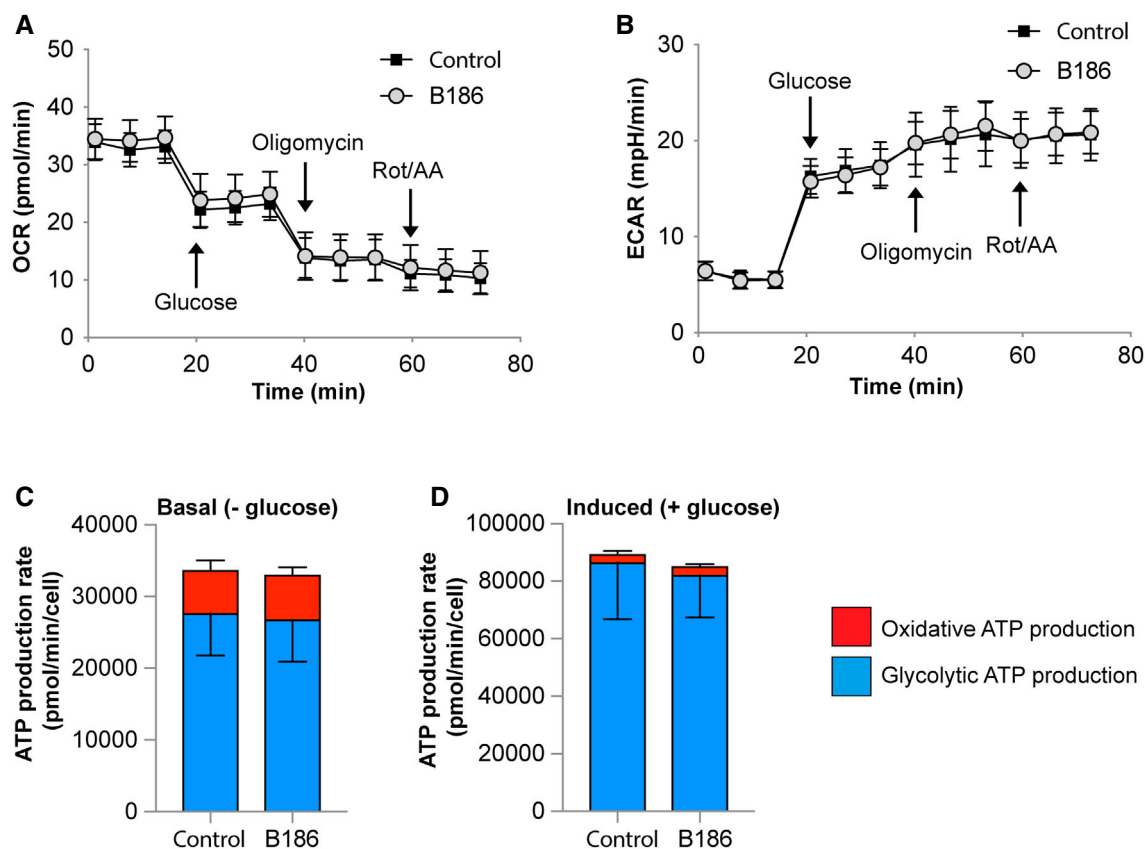

**Figure EV3. VEGF-B signaling does not change endothelial energy substrate use or energy balance.**

A, B Measurements of oxygen consumption rate (OCR, panel A) and extracellular acidification rate (ECAR, panel B) in primary human umbilical vein endothelial cells (HUVEC) stimulated or not with VEGF-B<sub>186</sub> (B186) for 2 h using the Seahorse® live-cell metabolic assay platform. Glucose, oligomycin and rotenone + antimycin A (Rot/AA) was added at the indicated time points. Data presented as mean ± SEM from a representative experiment performed with  $n = 43$ – $44$  wells/condition.

C, D Comparison of oxidative (mitochondrial) versus glycolytic ATP production rate after VEGF-B stimulation during basal (glucose-free) or glucose-induced conditions. Data presented as mean ± SEM from a representative experiment performed with  $n = 43$ – $44$  wells/condition.

**Figure EV4. VEGF-B signaling does not change expression of genes involved in endothelial cell metabolism.**

RNA from primary human brain microvascular endothelial cells (HBMEC) stimulated with VEGF-B<sub>167</sub>, VEGF-B<sub>186</sub>, or vehicle (Control) for 6 h ( $n = 3$  cell dishes/condition) were subjected to microarray hybridization using Affymetrix GeneChip® Human Gene 1.0 ST chips. Shown is a heat map over selected genes involved in intermediary metabolism (listed in Appendix Table S3). The three differentially expressed genes in response to VEGF-B stimulation are indicated with arrow heads.

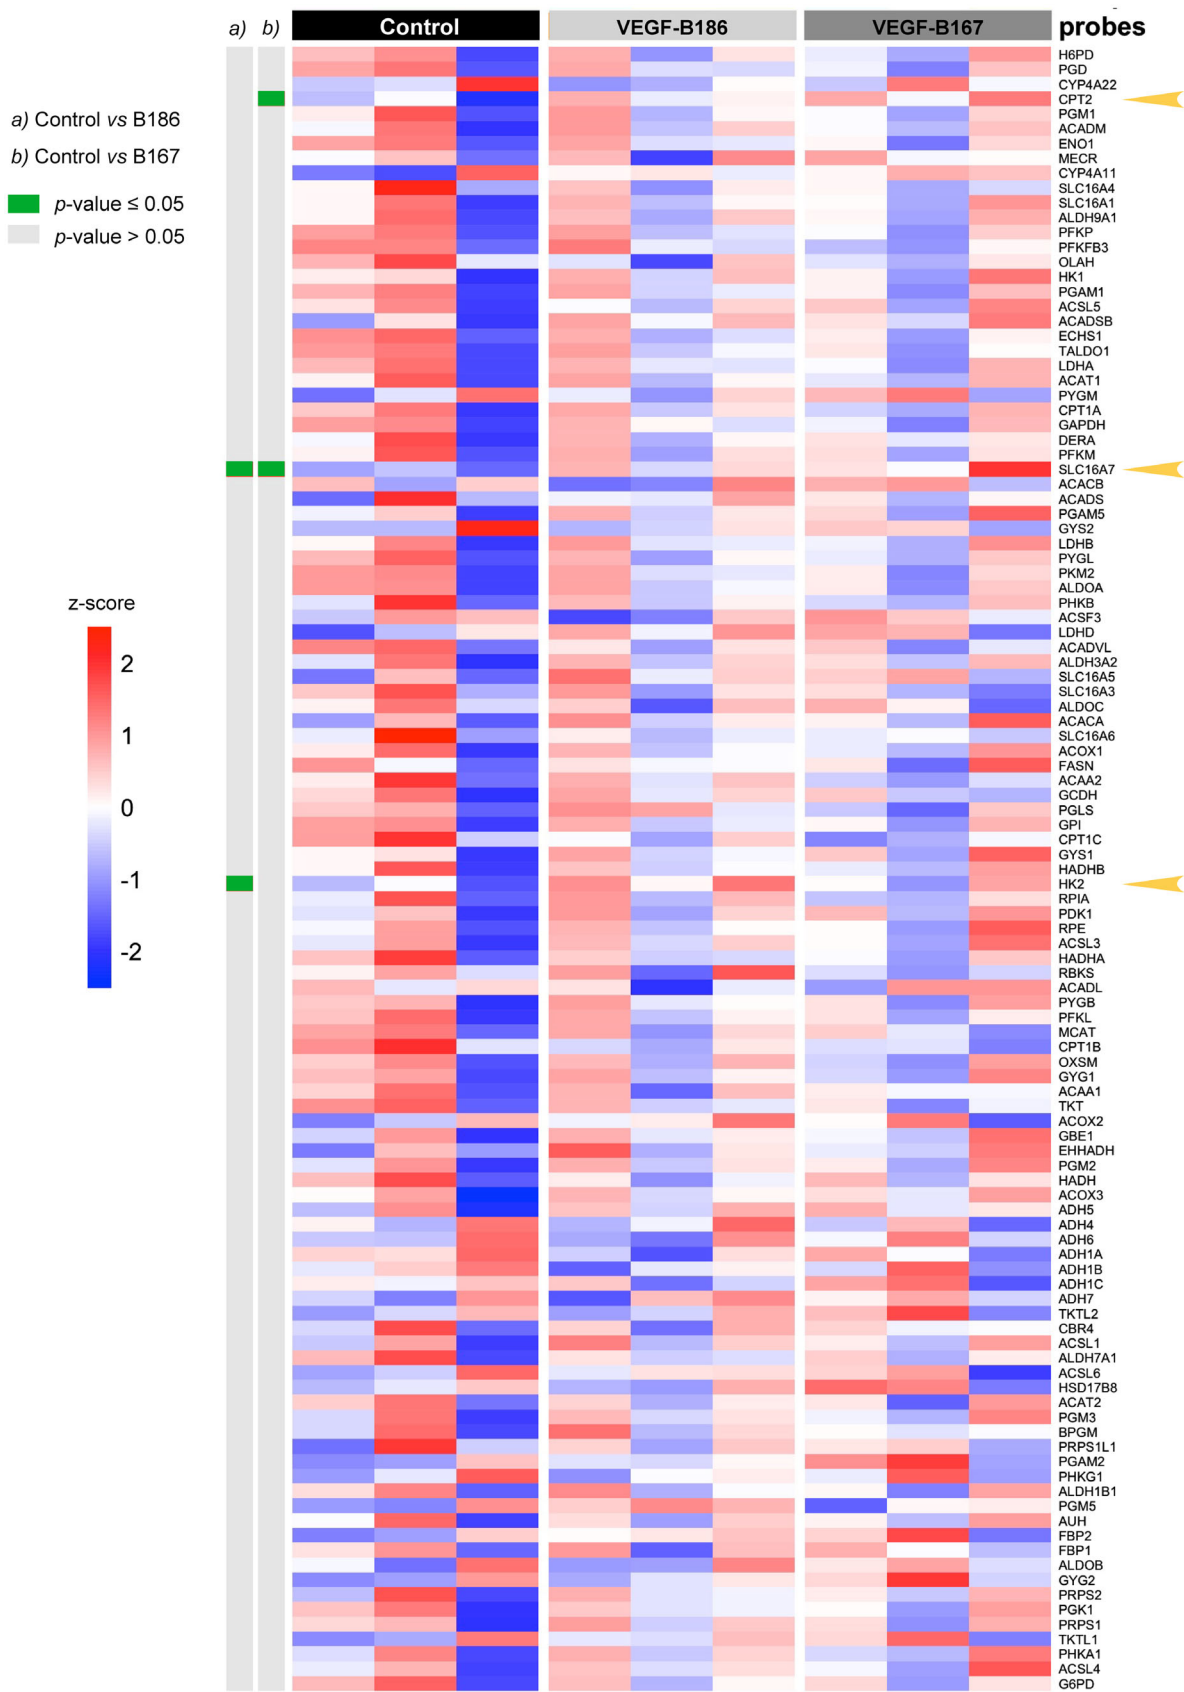

Figure EV4.

**Figure EV5. Fatty acid uptake by VEGF-B is cholesterol- and LDLR-independent.**

- A Bodipy-C<sub>12</sub>-FA uptake (left panel) and corresponding measurement of cellular cholesterol content (right panel) in primary human umbilical vein endothelial cells (HUVEC) treated for 2 h with VEGF-B<sub>186</sub> (B186) or 15 min with cholesterol-extracting methyl-beta-cyclodextrin (MbCD). Data presented as mean ± SEM from representative experiments performed in triplicates. Statistical evaluation using one-way ANOVA and Dunnett's multiple comparison test, *P*-value: \*\*< 0.01, \*\*\*< 0.001 (compared to untreated control).
- B Bodipy-C<sub>12</sub>-FA uptake (left panel) and corresponding measurement of cellular cholesterol content (right panel) in primary human umbilical vein endothelial cells (HUVEC) treated for 2 h with VEGF-B<sub>186</sub> or cholesterol-extracting methyl-beta-cyclodextrin (MbCD). Data presented as mean ± SEM from representative experiments performed in triplicates. Statistical evaluation using one-way ANOVA and Dunnett's multiple comparison test, *P*-value: \*< 0.05, \*\*< 0.01, \*\*\*< 0.001 (compared to untreated control).
- C Knockdown of *LDLR* and *SCARB1* (*SRB1*) mRNA expression following siRNA targeting in primary human umbilical vein endothelial cells (HUVEC), normalized to levels in control siRNA-treated cells. Data presented as mean ± SEM of three independent experiments relative to *RPL19* expression. Statistical evaluation using *t*-test, *P*-value: \*< 0.05, \*\*< 0.01 (compared to respective control siRNA).
- D Bodipy-C<sub>12</sub>-FA uptake in response to 2-h treatment with VEGF-B<sub>186</sub> (B186) in primary human umbilical vein endothelial cells (HUVEC) exhibiting siRNA-mediated knockdown of the *LDLR*. Data presented as mean ± SEM from a representative experiment performed in triplicates. Statistical evaluation using one-way ANOVA and Sidak's multiple comparison test, *P*-value: \*< 0.05, \*\*< 0.01 (compared to respective control).
- E Bodipy-C<sub>12</sub>-FA uptake in response to 2 h treatment with VEGF-B<sub>186</sub> (B186) in primary human umbilical vein endothelial cells (HUVEC) treated with simvastatin, a *de novo* cholesterol synthesis inhibitor. Data presented as mean ± SEM from a representative experiment performed in triplicates. Statistical evaluation using one-way ANOVA and Sidak's multiple comparison test, *P*-value: \*< 0.05 (compared to respective control).

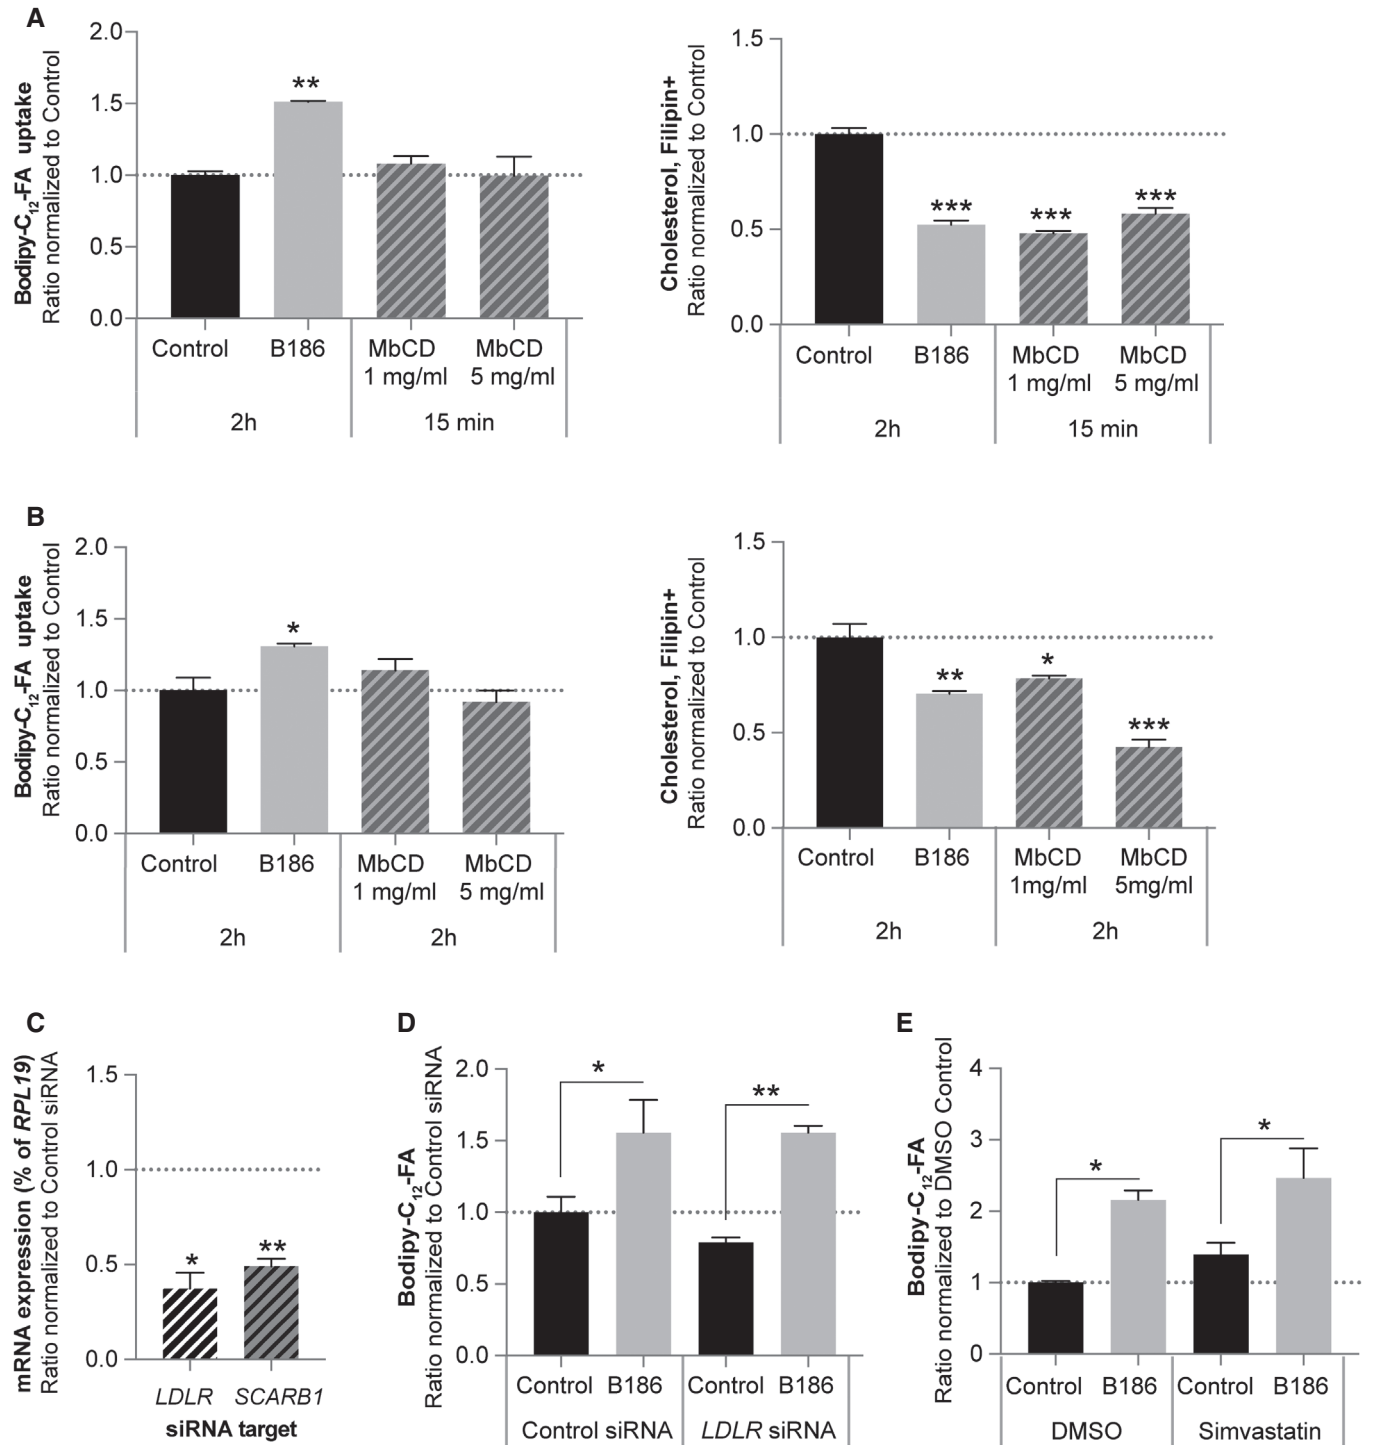

Figure EV5.
